# Supplementary material for: In vitrocombinations of inert phenolato Ti(iv) complexes with clinically employed anticancer chemotherapy: synergy with oxaliplatin on colon cells
Source: Royal Society of Chemistry journal article supplement (doi:10.1039/c8ra00229k), 2018-01-01
Supplement: c8ra00229k1.pdf [file c8ra00229k1.pdf]

***In vitro* Combinations of Inert Phenolato Ti(IV) complexes  
with Clinically Employed Anticancer Chemotherapy:  
Synergy with Oxaliplatin on Colon Cells**

*Electronic Supplementary Information*

Nitzan Ganot, Edit Y. Tshuva\*

The Institute of Chemistry,

The Hebrew University of Jerusalem,

Jerusalem 9190401 Israel.

Email: [edit.tshuva@mail.huji.ac.il](mailto:edit.tshuva@mail.huji.ac.il)

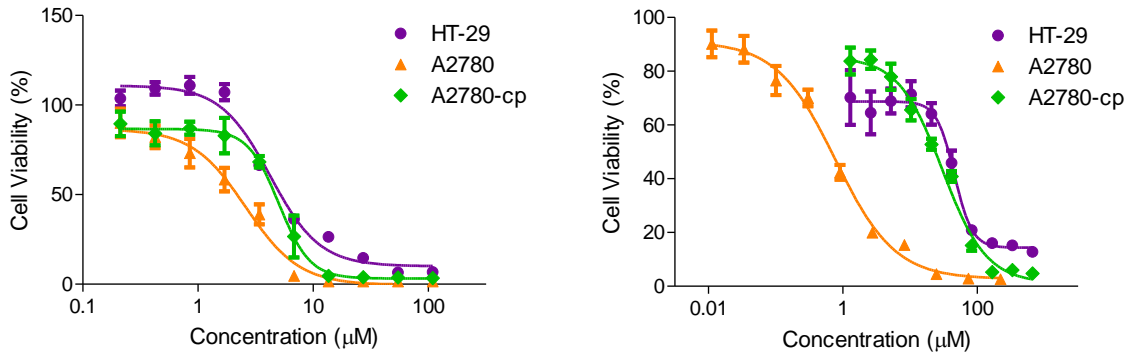

Fig. 1. Dose-response curves of  $L^1Ti$  (left) and cisplatin (right) against human colon HT-29 ( $IC_{50} = 4.3 \pm 0.5$  and  $30 \pm 4 \mu M$ , respectively), human ovarian A2780 ( $IC_{50} = 5 \pm 2$  and  $0.8 \pm 0.2 \mu M$ , respectively), and cisplatin-resistant human ovarian A2780-cp ( $IC_{50} = 4 \pm 2$  and  $32 \pm 6 \mu M$ , respectively) cell lines (including 3-day incubation period; based on 3 times 3 repetitions).

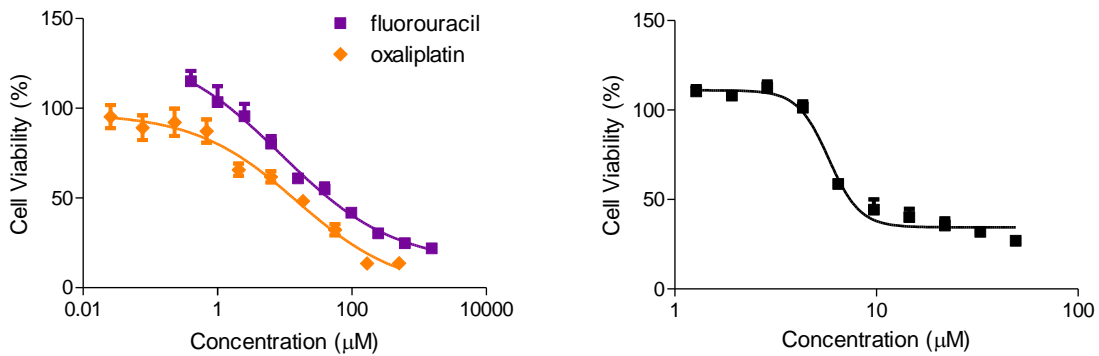

Fig. 2. Dose-response curves of fluorouracil and oxaliplatin (left) and  $L^2Ti$  (right) against human colon HT-29 cell lines ( $IC_{50} = 9 \pm 2$ ,  $12 \pm 2$  and  $5.8 \pm 0.6 \mu M$ , respectively). (including 3-day incubation period; based on 3 times 3 repetitions).

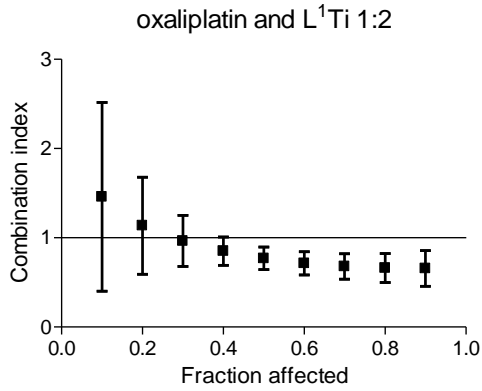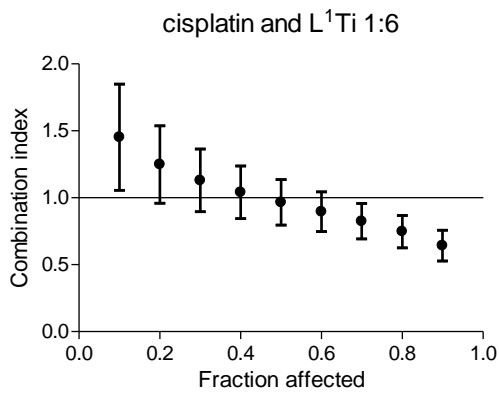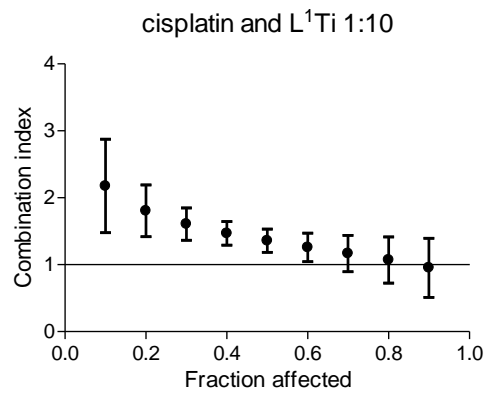

Fig. 3. Combination index for different effects on human colon HT-29 cancer cells by the combination of L<sup>1</sup>Ti with oxaliplatin (top) and cisplatin (bottom) at different ratios

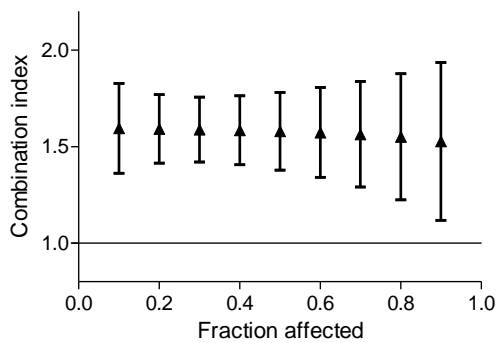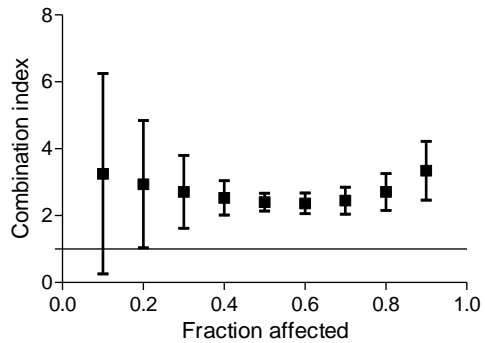

Fig. 4. Combination index for different effects on human colon HT-29 cancer cells by the combination of L<sup>1</sup>Ti with cisplatin (left) and oxaliplatin (right) at time interval of 6 hours between the administration of the agents.

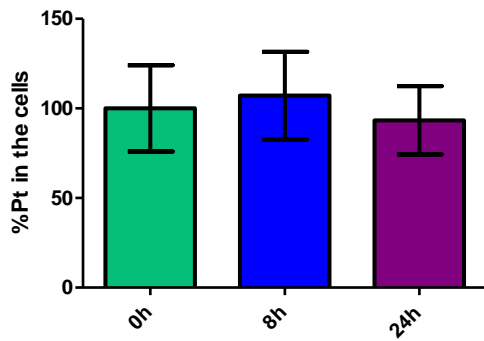

Fig. 5. Pt levels in cells treated first with  $L^1Ti$  ( $8.6 \mu M$ ) and after varying time interval with cisplatin ( $60 \mu M$ ); the overall incubation time was 48 hours.

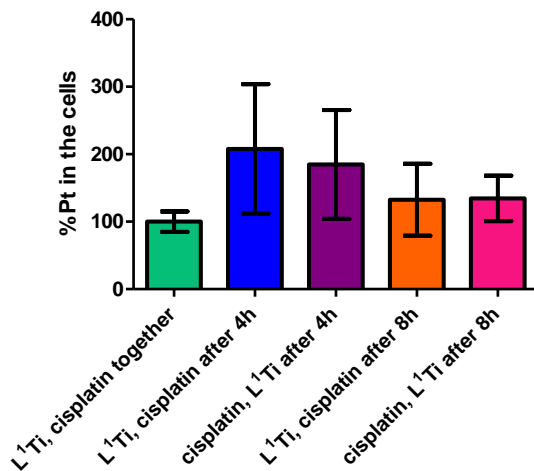

Fig. 6. Pt levels in cells treated with  $L^1Ti$  ( $8.6 \mu M$ ) and cisplatin ( $60 \mu M$ ) at varying time interval between the administration of the agents; the overall incubation time was 24 hours.
